# Supplementary material for: Meta‐Analysis of Expression Profiling Data Indicates Need for Combinatorial Biomarkers in Pediatric Ulcerative Colitis
Source: Hindawi journal article supplement (doi:10.1155/2020/8279619), 2020-01-01
Supplement: f1 [file 8279619.f1.pdf]

## Supplementary Data

### **Meta-analysis of expression profiling data indicates need for combinatorial biomarkers in pediatric ulcerative colitis**

Xinxu Li<sup>1\*</sup>, Eun Jung Lee<sup>1,2\*</sup>, Danuta R. Gawel<sup>1</sup>, Sandra Lilja<sup>1</sup>, Samuel Schäfer<sup>1</sup>, Huan Zhang<sup>1,3</sup>, Mikael Benson<sup>1,3</sup>

<sup>1</sup>Centre for Personalized Medicine, Linköping University, Linköping, Sweden.

<sup>2</sup>Department of Otorhinolaryngology, Yonsei University College of Medicine, Seoul, Korea.

<sup>3</sup>Crownprincess Victoria Children's Hospital, Linköping University Hospital, Sweden

\* Xinxu Li and Eun Jung Lee contributed equally to this work, shared first authors

Correspondence should be addressed to Mikael Benson; [mikael.benson@liu.se](mailto:mikael.benson@liu.se)

**Table S1. Expression levels of receptors for predicted upstream regulators that were not differentially expressed**

| The Upstream regulators(UR)                    | The receptors of UR     | NCBI Accession      | GSE9686            |           | GSE10616 |          |          |       |
|------------------------------------------------|-------------------------|---------------------|--------------------|-----------|----------|----------|----------|-------|
|                                                |                         |                     | q-value            | logFC     | q-value  | logFC    |          |       |
| <i>TNF</i>                                     | <i>TNFR1</i>            | NM_001065           | 0.964449           | -0.008    | 0.802000 | -0.03    |          |       |
|                                                | <i>TNFR2*</i>           | NM_001066           | 0.000567           | 1.308     | 0.000056 | 1.32     |          |       |
| <i>OSM</i>                                     | <i>OSMR*</i>            | NM_003999           | 0.000004           | 2.28      | 0.000256 | 2.19     |          |       |
|                                                | <i>OSM/EBI3/ IL-27B</i> | <i>gp130/IL6ST*</i> | NM_175767          | 0.004510  | 1.24     | 0.002669 | 1.64     |       |
| NM_002184                                      |                         |                     | 0.004750           | 1.232     | 0.002640 | 1.64     |          |       |
| NM_172248                                      |                         |                     | 0.000993           | 1.418     | 0.000547 | 1.45     |          |       |
| NM_172246                                      |                         |                     | 0.001640           | 1.67      | 0.000642 | 1.79     |          |       |
| <i>CSF2</i>                                    | <i>CSF2RA*</i>          | NM_006140           | 0.001820           | 1.672     | 0.000605 | 1.86     |          |       |
|                                                |                         | NM_172247           | 0.001820           | 1.742     | 0.000638 | 1.87     |          |       |
|                                                |                         | NM_172245           | 0.001780           | 1.674     | 0.000524 | 1.89     |          |       |
|                                                |                         | NM_172249           | 0.000954           | 1.249     | 0.001865 | 1.11     |          |       |
|                                                |                         | <i>VEGF/VEGFA</i>   | <i>VEGFR3/FLT4</i> | NM_002020 | 0.135000 | 0.21     | 0.191192 | 0.25  |
|                                                |                         |                     |                    | NM_182925 | 0.066300 | -0.181   | 0.139729 | -0.18 |
| <i>IL1</i>                                     | <i>VEGFR2/FLK1/KDR*</i> | NM_002253           | 0.000100           | 1.503     | 0.000453 | 1.88     |          |       |
|                                                |                         | <i>IL1R1</i>        | NM_000877          | 0.003790  | 0.697    | 0.014902 | 0.64     |       |
|                                                |                         | <i>IL1R2</i>        | NM_004633          | 0.611000  | -0.208   | 0.925082 | 0.05     |       |
| <i>IL18</i>                                    | <i>IL18R1*</i>          | NM_173343           | 0.616000           | -0.205    | 0.926827 | 0.05     |          |       |
|                                                |                         | NM_003855           | 0.000286           | 1.122     | 0.002777 | 1.12     |          |       |
|                                                |                         | NM_003853           | 0.005910           | 0.86      | 0.048610 | 0.71     |          |       |
| <i>PDGF BB/PDGF (complex)</i>                  | <i>PDGFRA*</i>          | NM_006206           | 0.021700           | 1.634     | 0.018271 | 2.02     |          |       |
|                                                |                         | NM_002609           | 0.002460           | 1.128     | 0.048746 | 0.87     |          |       |
|                                                |                         | <i>PDGFRB</i>       | NM_033016          | 0.106000  | -0.246   | 0.008526 | -0.52    |       |
|                                                |                         | NM_002608           | 0.150000           | -0.24     | 0.048746 | 0.87     |          |       |
| <i>IL5</i>                                     | <i>IL5RA</i>            | NM_175728           | 0.297000           | 0.123     | 0.258163 | 0.14     |          |       |
|                                                |                         | NM_175725           | 0.318000           | 0.118     | 0.262857 | 0.14     |          |       |
|                                                |                         | NM_000564           | 0.532000           | 0.063     | 0.423365 | 0.09     |          |       |
|                                                |                         | NM_175726           | 0.530000           | 0.065     | 0.491669 | 0.08     |          |       |
|                                                |                         | NM_175727           | 0.926000           | 0.009     | 0.851207 | -0.02    |          |       |
| <i>IL7/TSLP IL12 (complex)</i>                 | <i>IL7R</i>             | NM_175724           | 0.990000           | 0.001     | 0.876582 | -0.02    |          |       |
|                                                |                         | NM_002185           | 0.013300           | 1.534     | 0.053356 | 1.61     |          |       |
|                                                |                         | <i>IL12RB1</i>      | NM_005535          | 0.997000  | -4E-04   | 0.724499 | -0.06    |       |
|                                                |                         | NM_153701           | 0.997000           | -4E-04    | 0.000684 | 1.5      |          |       |
|                                                |                         | <i>IL12RB2*</i>     | NM_001559          | 0.008480  | 0.368    | 0.037771 | 0.35     |       |
| <i>IFN/IFNA1/IFNA2/IFNA13/IFNB1 /IFNE/IFNK</i> | <i>IFNAR1</i>           | NM_000629           | 0.019900           | 0.519     | 0.001944 | 0.72     |          |       |
|                                                |                         | <i>IFNAR2*</i>      | NM_207585          | 0.000651  | 0.666    | 0.001634 | 0.75     |       |
|                                                |                         | NM_207584           | 0.000018           | 1.501     | 0.000164 | 1.52     |          |       |
|                                                |                         | NM_000874           | 0.000018           | 1.504     | 0.000168 | 1.52     |          |       |
| <i>CG IL21</i>                                 | <i>LHCGR</i>            | NM_000233           | 0.246000           | -0.123    | 0.074687 | -0.21    |          |       |
|                                                |                         | <i>IL21R*</i>       | NM_021798          | 0.000114  | 1.297    | 0.002189 | 1.47     |       |
|                                                |                         | NM_181079           | 0.000119           | 1.299     | 0.002204 | 1.47     |          |       |
| <i>EGF/BTC</i>                                 | <i>EGFR</i>             | NM_181078           | 0.000123           | 1.299     | 0.002223 | 1.47     |          |       |
|                                                |                         | NM_201284           | 0.034400           | -0.262    | 0.060171 | -0.29    |          |       |
|                                                |                         | NM_005228           | 0.007750           | -0.402    | 0.054154 | -0.36    |          |       |
|                                                |                         | NM_201282           | 0.017100           | -0.455    | 0.003126 | -0.54    |          |       |
| <i>CCL5/CCL3</i>                               | <i>CCR1*</i>            | NM_201283           | 0.023400           | -0.306    | 0.032851 | -0.36    |          |       |
|                                                |                         | <i>CCR3</i>         | NM_001295          | 0.000850  | 2.092    | 0.000718 | 2.42     |       |
|                                                |                         | NM_001837           | 0.627000           | -0.191    | 0.885801 | -0.06    |          |       |
|                                                |                         | NM_178329           | 0.585000           | -0.213    | 0.857326 | -0.08    |          |       |

|                    |                        |                 |                |           |          |          |          |
|--------------------|------------------------|-----------------|----------------|-----------|----------|----------|----------|
| <i>Fibrinogen</i>  | <i>ITGB1</i> *         | NM_002211       | 0.007160       | 0.684     | 0.001157 | 1.18     |          |
|                    |                        | NM_033668       | 0.188000       | 0.21      | 0.014916 | 0.46     |          |
|                    |                        | NM_033666       | 0.505000       | 0.053     | 0.432250 | 0.08     |          |
| <i>IL17F</i>       | <i>ITGA5</i>           | NM_002205       | 0.086000       | 0.322     | 0.548843 | 0.16     |          |
|                    |                        | <i>ITGA2B</i>   | NM_000419      | 0.421000  | -0.075   | 0.055396 | -0.24    |
|                    |                        | <i>IL-17RC</i>  | NM_032732      | 0.013300  | -0.288   | 0.009987 | -0.42    |
| <i>IL17F/IL17C</i> | <i>IL-17RA</i>         | NM_153461       | 0.011800       | -0.295    | 0.011586 | -0.42    |          |
|                    |                        | NM_153460       | 0.014400       | -0.285    | 0.010955 | -0.42    |          |
|                    |                        | NM_014339       | 0.528000       | 0.064     | 0.614741 | -0.06    |          |
| <i>SAA</i>         | <i>CD36</i>            | NM_001001547    | 0.938000       | 0.05      | 0.698807 | 0.28     |          |
|                    |                        | NM_000072       | 0.938000       | 0.05      | 0.706475 | 0.27     |          |
|                    |                        | NM_001001548    | 0.376000       | 0.518     | 0.068235 | 1.25     |          |
| <i>LTA/LT</i>      | <i>LTBR</i>            | NM_002342       | 0.007910       | -0.34     | 0.090781 | -0.25    |          |
| <i>IL27/EBI3</i>   | <i>IL27RA</i> *        | NM_004843       | 0.000514       | 1.029     | 0.004754 | 1.14     |          |
| <i>IFNL1</i>       | <i>IL10RB</i>          | NM_000628       | 0.009250       | -0.409    | 0.077122 | -0.34    |          |
|                    |                        | <i>IFNLR1</i>   | NM_170743      | 0.009320  | -0.483   | 0.055396 | -0.46    |
| <i>Ap1</i>         | <i>TAC1</i>            | NM_012452       | 0.336000       | 0.181     | 0.198392 | 0.28     |          |
| <i>IL22</i>        | <i>/BCMA/TNFRSF13B</i> | <i>IL22RA1</i>  | NM_021258      | 0.270000  | -0.3     | 0.687153 | -0.14    |
|                    |                        | <i>IL22RA2</i>  | NM_181310      | 0.018900  | 1.078    | 0.118424 | 0.78     |
|                    |                        | NM_181309       | 0.019000       | 1.077     | 0.117328 | 0.78     |          |
| <i>IL23</i>        | <i>IL23R</i>           | NM_052962       | 0.019300       | 1.069     | 0.115673 | 0.78     |          |
|                    |                        | NM_144701       | 0.010100       | -0.6      | 0.079804 | -0.45    |          |
|                    |                        | <i>CCL3</i>     | <i>CCR4</i>    | NM_005508 | 0.441000 | -0.091   | 0.900976 |
| <i>IL36A</i>       | <i>IL1RL2</i>          | NM_003854       | 0.003870       | -0.439    | 0.003214 | -0.51    |          |
|                    |                        | <i>IL1RAP</i> * | NM_002182      | 0.048500  | 0.283    | 0.087739 | 0.33     |
|                    |                        | NM_134470       | 0.008990       | 0.415     | 0.009676 | 0.48     |          |
| <i>C5</i>          | <i>C5AR1</i> *         | NM_001736       | 0.000735       | 0.961     | 0.019548 | 0.78     |          |
|                    |                        | <i>TGFBR1</i> * | NM_004612      | 0.001150  | 1.164    | 0.001091 | 1.38     |
|                    |                        | <i>TGFBR2</i> * | NM_001024847   | 0.003400  | 0.713    | 0.003924 | 0.9      |
| <i>TSLP</i>        | <i>CRLF2</i>           | NM_003242       | 0.003470       | 0.712     | 0.004039 | 0.9      |          |
|                    |                        | NM_022148       | 0.365000       | -0.13     | 0.296690 | -0.17    |          |
|                    |                        | <i>IL17C</i>    | <i>IL-17RE</i> | NM_153483 | 0.000649 | -0.656   | 0.003525 |
| <i>MIF</i>         | <i>CXCR2</i> *         | NM_153482       | 0.000687       | -0.654    | 0.003553 | -0.7     |          |
|                    |                        | NM_153481       | 0.000667       | -0.655    | 0.003468 | -0.71    |          |
|                    |                        | NM_153480       | 0.000709       | -0.65     | 0.003707 | -0.7     |          |
|                    |                        | NM_144640       | 0.000800       | -0.643    | 0.005108 | -0.68    |          |
|                    |                        | NM_001557       | 0.000031       | 2.744     | 0.001082 | 2.32     |          |
|                    |                        | <i>CXCR4</i>    | NM_001008540   | 0.121000  | 1.096    | 0.207240 | 1.13     |
|                    |                        | NM_003467       | 0.121000       | 1.097     | 0.206988 | 1.13     |          |
|                    |                        | <i>CD74</i> *   | NM_001025159   | 0.000539  | 1.64     | 0.000350 | 2.17     |
|                    |                        | NM_004355       | 0.000172       | 1.891     | 0.000345 | 2.29     |          |
|                    |                        | NM_001025158    | 0.000172       | 1.892     | 0.000345 | 2.29     |          |
| <i>AP-1</i>        | <i>CTLA4</i>           | NM_005214       | 0.007710       | 1.078     | 0.063021 | 0.94     |          |
|                    |                        | NM_001037631    | 0.007280       | 1.136     | 0.065263 | 0.98     |          |
| <i>PRL</i>         | <i>PRLR</i>            | NM_000949       | 0.052300       | -0.172    | 0.094922 | -0.2     |          |
| <i>AIMP1</i>       | <i>FCER2</i>           | NM_002002       | 0.884000       | 0.028     | 0.919485 | -0.03    |          |
| <i>IGF2</i>        | <i>IGF2R</i>           | NM_000876       | 0.792000       | -0.034    | 0.962755 | -0.01    |          |
| <i>GHI</i>         | <i>GHR</i>             | NM_000163       | 0.238000       | 0.673     | 0.053277 | 1.08     |          |
| <i>LDL</i>         | <i>LDLR</i>            | NM_000527       | 0.649000       | 0.167     | 0.540602 | -0.22    |          |

\* Positive logFC and q-value < 0.05

**Table S2. Expression levels of receptors to predicted upstream regulators that were differentially expressed**

| The Upstream regulators(UR) | The receptors of UR | NCBI Accession | GSE9686    |             | GSE10616 |            |
|-----------------------------|---------------------|----------------|------------|-------------|----------|------------|
|                             |                     |                | q-value    | logFC       | q-value  | logFC      |
| <i>IL1B/IL1A</i>            | <i>IL1R1</i>        | NM_000877      | 0.01490168 | 0.638078    | 0.05192  | 0.5047544  |
|                             | <i>IL1R2</i>        | NM_004633      | 0.92508222 | 0.04612376  | 0.73942  | -0.1604044 |
| <i>IFNG</i>                 | <i>IFNGR1*</i>      | NM_000416      | 0.00203069 | 0.64796339  | 0.03232  | 0.4309898  |
|                             | <i>IFNGR2</i>       | NM_005534      | 0.02734678 | -0.35199119 | 0.01784  | -0.3421646 |
| <i>TGFBI</i>                | <i>TGFBR1</i>       | NM_032811      | 0.07843288 | -0.39924435 | 0.22272  | -0.2552363 |
|                             | <i>TGFBR4</i>       | NM_030900      | 0.00012386 | -1.21207349 | 0.00818  | -0.9596834 |
|                             |                     | NM_199122      | 0.00012923 | -1.20612685 | 0.00804  | -0.957314  |
| <i>IL17A</i>                |                     | NM_004749      | 0.00014338 | -1.19615166 | 0.00813  | -0.9598502 |
|                             | <i>IL17RA</i>       | NM_014339      | 0.61474102 | -0.05812228 | 0.57487  | -0.0549465 |
|                             | <i>IL17RB</i>       | NM_018725      | 0.00320971 | -1.21518581 | 0.01276  | -0.9942018 |
|                             |                     | NM_172234      | 0.00321339 | -1.2161327  | 0.01276  | -0.9952967 |
|                             | <i>IL17RC</i>       | NM_153460      | 0.01095515 | -0.41716286 | 0.05786  | -0.2613939 |
|                             |                     | NM_153461      | 0.01158635 | -0.41533981 | 0.054    | -0.2678711 |
|                             |                     | NM_032732      | 0.00998736 | -0.42431466 | 0.05242  | -0.2668482 |
| <i>IL17A</i>                | <i>IL17RD</i>       | NM_017563      | 0.01572808 | -0.3488694  | 0.018    | -0.3839925 |
|                             | <i>IL17RE</i>       | NM_153481      | 0.00346814 | -0.70505616 | 0.00379  | -0.7338211 |
|                             |                     | NM_153480      | 0.00370663 | -0.70220352 | 0.00379  | -0.7303083 |
|                             |                     | NM_153483      | 0.00352486 | -0.70017927 | 0.00379  | -0.734637  |
| <i>IL6</i>                  |                     | NM_144640      | 0.00510833 | -0.67756985 | 0.00379  | -0.7237509 |
|                             | <i>IL6R</i>         | NM_181359      | 0.03256818 | -0.42177306 | 0.04104  | -0.369827  |
|                             |                     | NM_000565      | 0.03400864 | -0.41762472 | 0.04261  | -0.3632954 |

\* Positive logFC and q-value < 0.05

**Table S3. Pathways that overlapped between expression profiling data from three studies of colonic biopsies and whole blood cells from pediatric ulcerative colitis (z-score > 2 and P value < 0.05)**

| Positive canonical pathway                                                   | Activation z-score |          |           | P-value  |          |           |
|------------------------------------------------------------------------------|--------------------|----------|-----------|----------|----------|-----------|
|                                                                              | GSE9686            | GSE10616 | GSE119600 | GSE9686  | GSE10616 | GSE119600 |
| Tec Kinase Signaling                                                         | 3.81               | 2.714    | 3.244     | 0.002344 | 0.012882 | 0.000004  |
| IL-8 Signaling                                                               | 3.666              | 3.349    | 2.885     | 0.006166 | 0.011749 | 0.0002    |
| TREM1 Signaling                                                              | 3.317              | 3.651    | 3.528     | 0.00003  | 0.003236 | 0.000004  |
| Role of Pattern Recognition Receptors in Recognition of Bacteria and Viruses | 3.28               | 2.746    | 2.6       | 0.022909 | 0.012882 | 0.039811  |
| Production of Nitric Oxide and Reactive Oxygen Species in Macrophages        | 3.13               | 3.048    | 3.464     | 0.012303 | 0.00302  | 0.001072  |
| Leukocyte Extravasation Signaling                                            | 2.951              | 2.63     | 2.714     | 0.00000  | 0.00000  | 0.012303  |
| Acute Phase Response Signaling                                               | 2.898              | 2.263    | 3.28      | 0.006918 | 0.00138  | 0.016218  |
| Neuroinflammation Signaling Pathway                                          | 2.866              | 2.36     | 3.447     | 0.00912  | 0.001148 | 0.013183  |

**Table S4. List of differentially expressed predicted upstream regulators in whole blood cells**

| Upstream Regulator    | Log FC | Activation z-score |
|-----------------------|--------|--------------------|
| <i>VEGF</i>           |        | 3.946              |
| <i>HGF</i>            |        | 3.674              |
| <i>TGFB1</i>          |        | 3.455              |
| <i>OSM</i>            | 0.406  | 3.056              |
| <i>AR</i>             |        | 2.705              |
| <i>IL6</i>            |        | 2.616              |
| <i>EGF</i>            |        | 2.525              |
| <i>LIF</i>            |        | 2.472              |
| <i>EDNRA</i>          |        | 2.449              |
| <i>Nr1h</i>           |        | 2.449              |
| <i>INHBA</i>          |        | 2.444              |
| <i>FGF2</i>           |        | 2.383              |
| <i>26s Proteasome</i> |        | 2.368              |
| <i>CSF1</i>           |        | 2.324              |
| <i>CSF3</i>           |        | 2.305              |
| <i>PDGF BB</i>        |        | 2.282              |
| <i>IGF1</i>           |        | 2.247              |
| <i>LRP6</i>           |        | 2.216              |
| <i>PGR</i>            |        | 2.169              |
| <i>SELP</i>           |        | 2.121              |
| <i>FGF8</i>           |        | 2.111              |

**Table S5. List of potential biomarkers for ulcerative colitis in whole blood cells**

| Gene symbol     | NCBI Accession | GSE119600 UC (Log FC) |
|-----------------|----------------|-----------------------|
| <i>FGFBP2</i>   | NM_031950      | -0.796                |
| <i>IL32</i>     | NM_001012631   | -0.686                |
| <i>MUC6</i>     | NM_005961      | -0.678                |
| <i>LGALS3</i>   | NM_001357678   | -0.512                |
| <i>PII6</i> *   | NM_001199159   | -0.508                |
| <i>ADM</i>      | NM_001124      | 0.515                 |
| <i>PROK2</i>    | NM_001126128   | 0.522                 |
| <i>COL18A1</i>  | NM_030582      | 0.539                 |
| <i>F5</i>       | NM_000130      | 0.624                 |
| <i>JCHAIN</i>   | NM_144646      | 1.09                  |
| <i>MZB1</i> *,# | NM_016459      | 1.1                   |
| <i>MMP9</i>     | NM_004994      | 1.25                  |

\*Indicates new potential biomarkers in blood; # Indicates new potential biomarkers in colon.

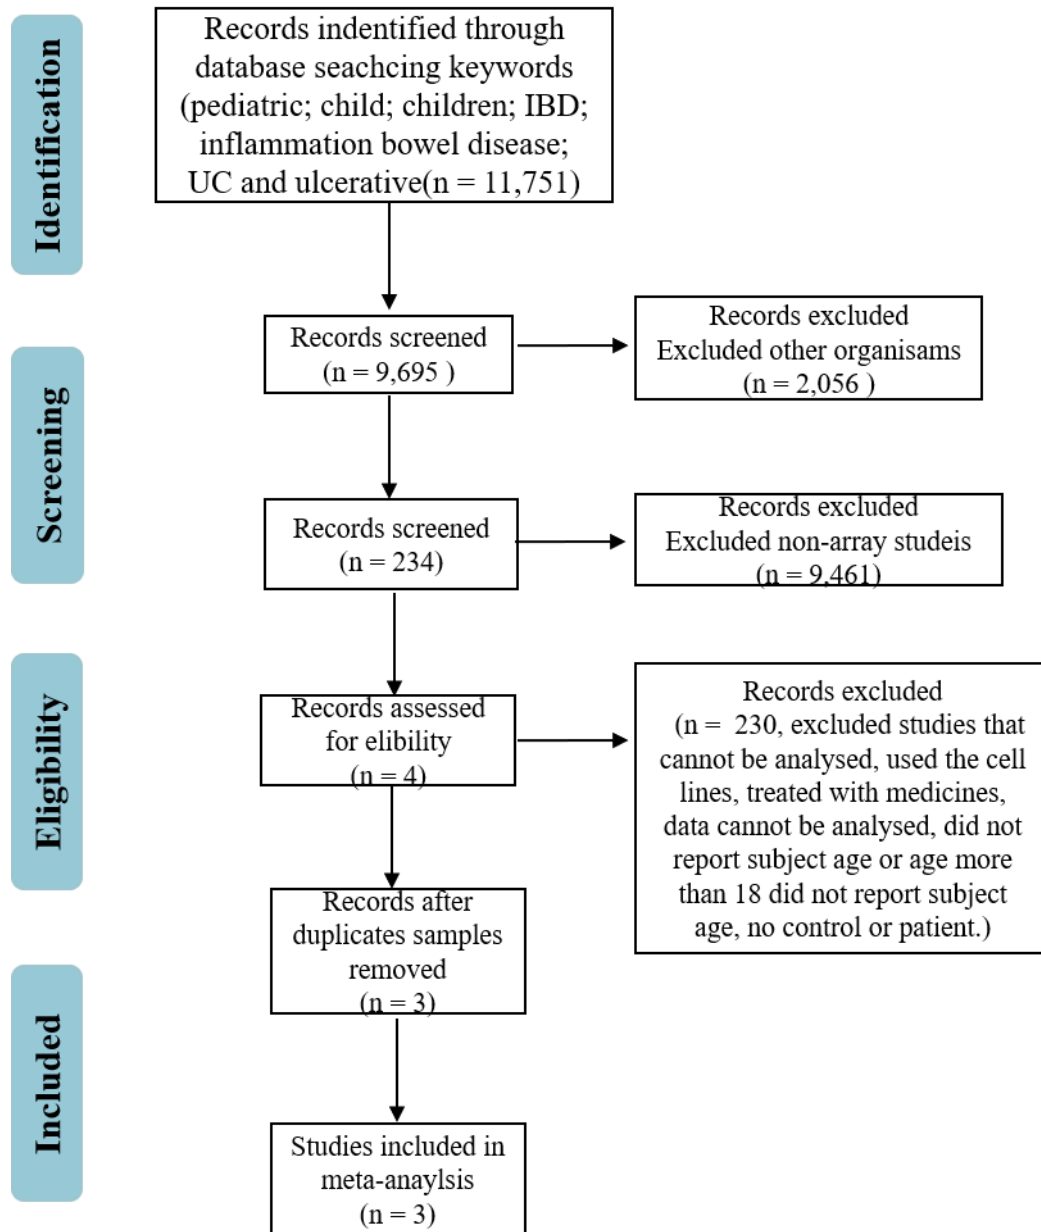

**Figure S1. Summary of workflow used for the microarray meta-analysis**



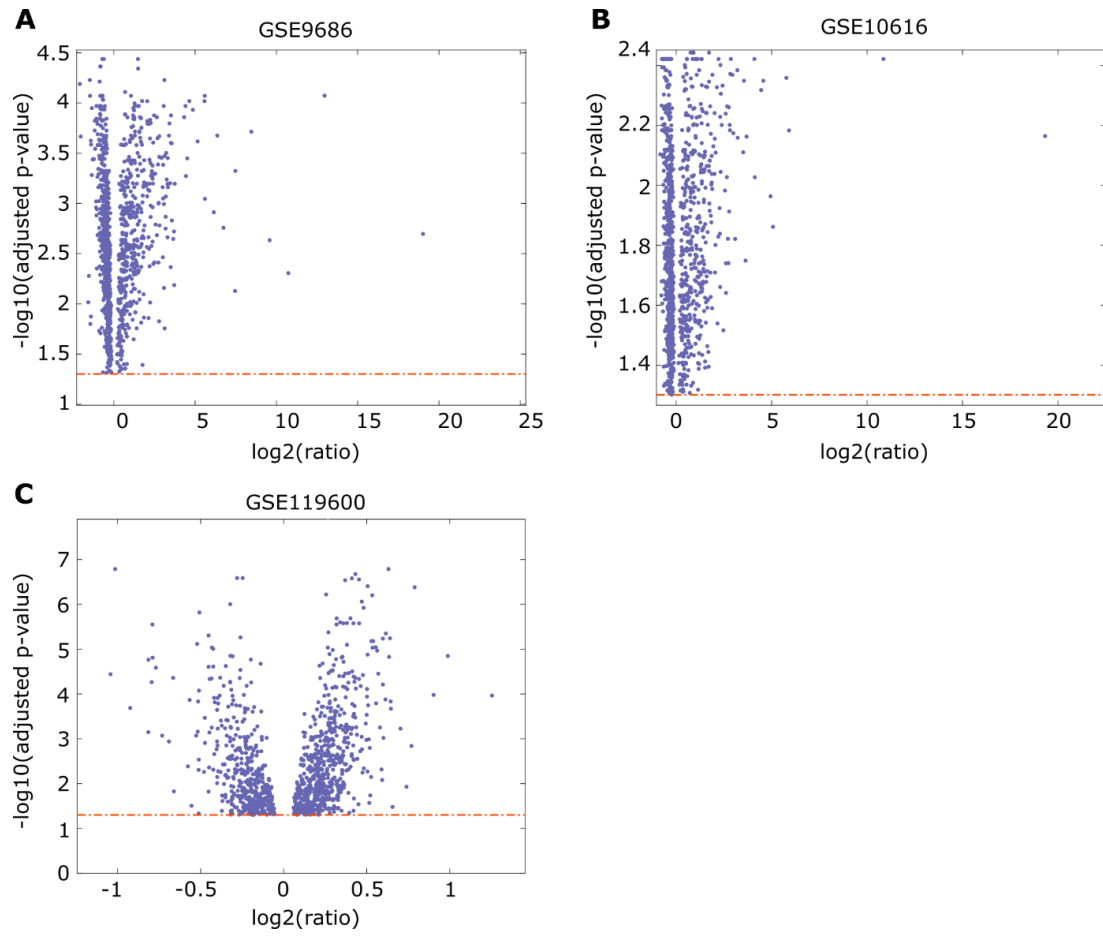

**Figure S2. Volcano plots for three datasets**

Volcano plots showing differentially expressed genes shared by all datasets. Red horizontal line denotes adjusted P-value cutoff of 0.05
